# Supplementary material for: Silanization as a versatile functionalization method for the synthesis of polymer/magnetite hybrid nanoparticles with controlled structure
Source: Royal Society of Chemistry journal article supplement (doi:10.1039/c6ra08896a), 2016-01-01
Supplement: c6ra08896a1.pdf [file c6ra08896a1.pdf]

### Electronic supplementary information

## Silanization as a versatile functionalization method for the synthesis of polymer/magnetite hybrid nanoparticles with controlled structure

Alexander Schoth,<sup>a</sup> Alasdair D. Keith,<sup>a</sup> Katharina Landfester<sup>a</sup> and Rafael Muñoz-Espí<sup>a,b,\*</sup>

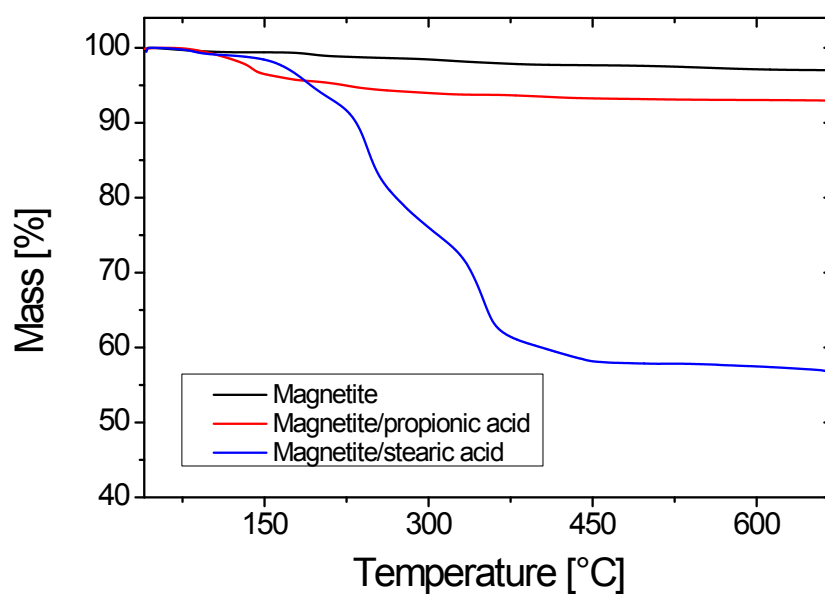

**Figure S1.** Thermogravimetric analysis of magnetite nanoparticles with different surface functionalizations.
